# Supplementary material for: Effect of Adhesion and Substrate Elasticity on Neutrophil Extracellular Trap Formation
Source: PubMed Central journal article supplement (PMC6781793; doi:10.3389/fimmu.2019.02320), 2019-10-01
Supplement: Data_Sheet_1.pdf [file Data_Sheet_1.pdf]

## **Supplementary information**

### **Effect of Adhesion and Substrate Elasticity on Neutrophil Extracellular Trap Formation**

Luise Erpenbeck<sup>1#\*</sup>, Antonia Luise Gruhn<sup>1#</sup>, Galina Kudryasheva<sup>2</sup>, Gökhan Günay<sup>1,4</sup>, Daniel Meyer<sup>4</sup>, Julia Busse<sup>1</sup>, Elsa Neubert<sup>1,4</sup>, Michael P. Schön<sup>1,3</sup>, Florian Rehfeldt<sup>2</sup>, Sebastian Kruss<sup>4\*</sup>

*<sup>1</sup>Department of Dermatology, Venereology and Allergology, University Medical Center, Göttingen University, Germany*

*<sup>2</sup>Third Institute of Physics - Biophysics, Göttingen University, Germany*

*<sup>3</sup>Lower Saxony Institute of Occupational Dermatology, University Medical Center Göttingen, Germany*

*<sup>4</sup>Institute of Physical Chemistry, Göttingen University, Germany*

*#These authors contributed equally*

*\*Corresponding authors: [skruss@gwdg.de](mailto:skruss@gwdg.de) (SK), [luise.erpenbeck@med.uni-goettingen.de](mailto:luise.erpenbeck@med.uni-goettingen.de) (LE)*

### Collagen I coating

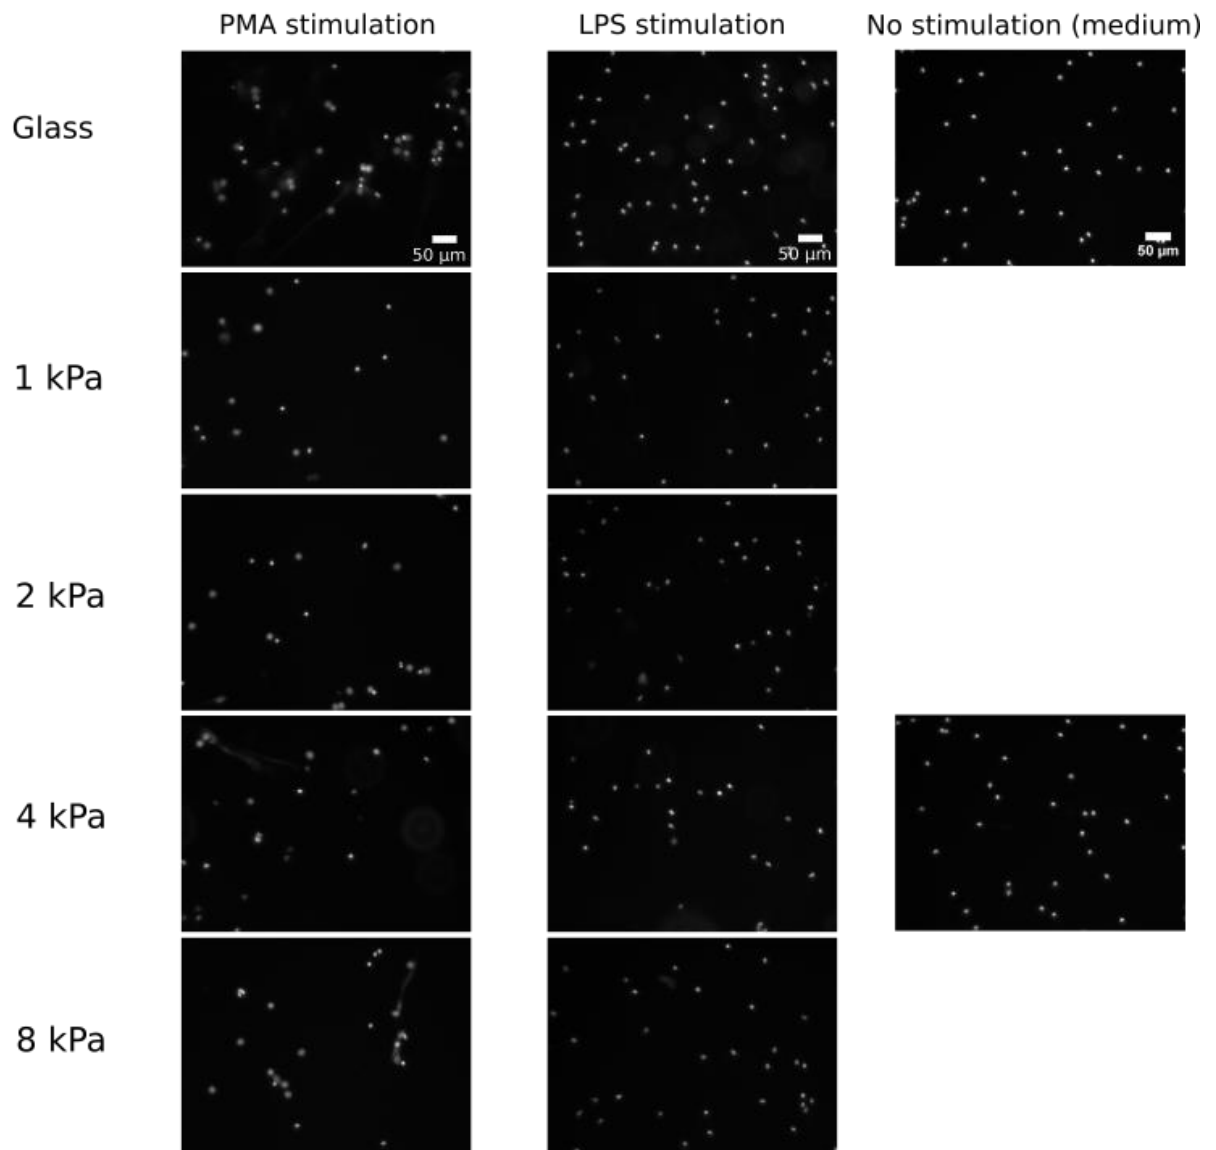

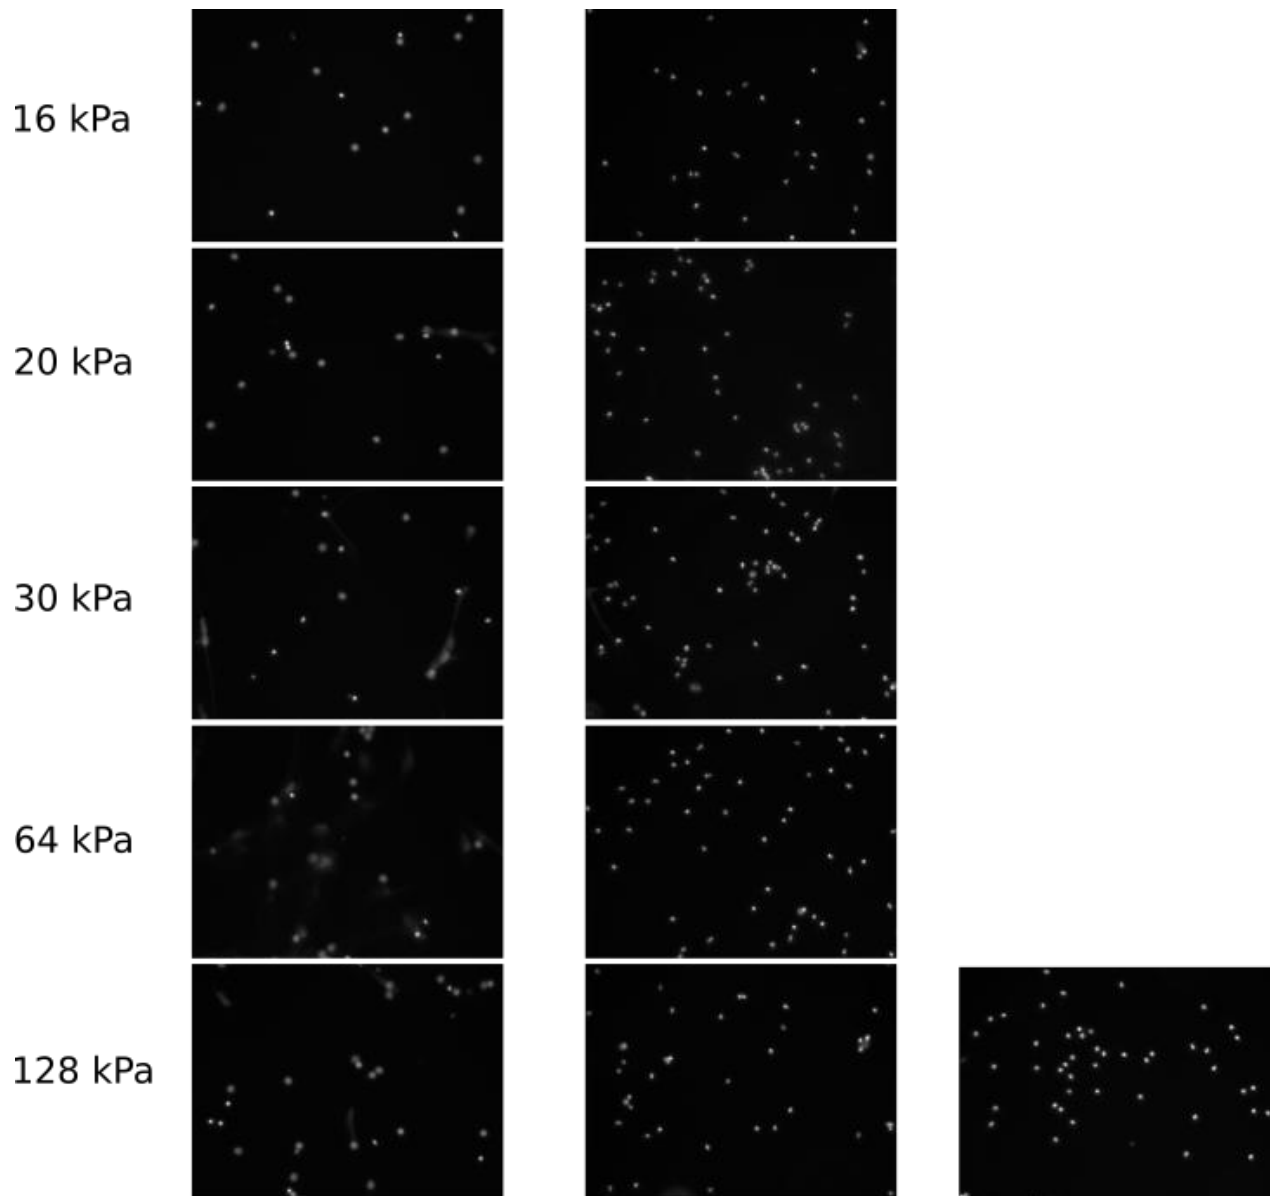

**Supplementary figure S1. Fluorescence images of stimulated neutrophils on PAA gels coated with collagen I.** Freshly isolated neutrophils were seeded on polyacrylamide substrates and glass surfaces coated with collagen I and stimulated either with PMA or LPS for 3h. As vehicle control, neutrophils on 4 kPa and 128 kPa gels were incubated only with RPMI media. After fixation with 2% PFA, cells were stained with Hoechst 33342/ DNA and representative images were taken from each well to quantify NETosis rates.

## Fibrinogen coating

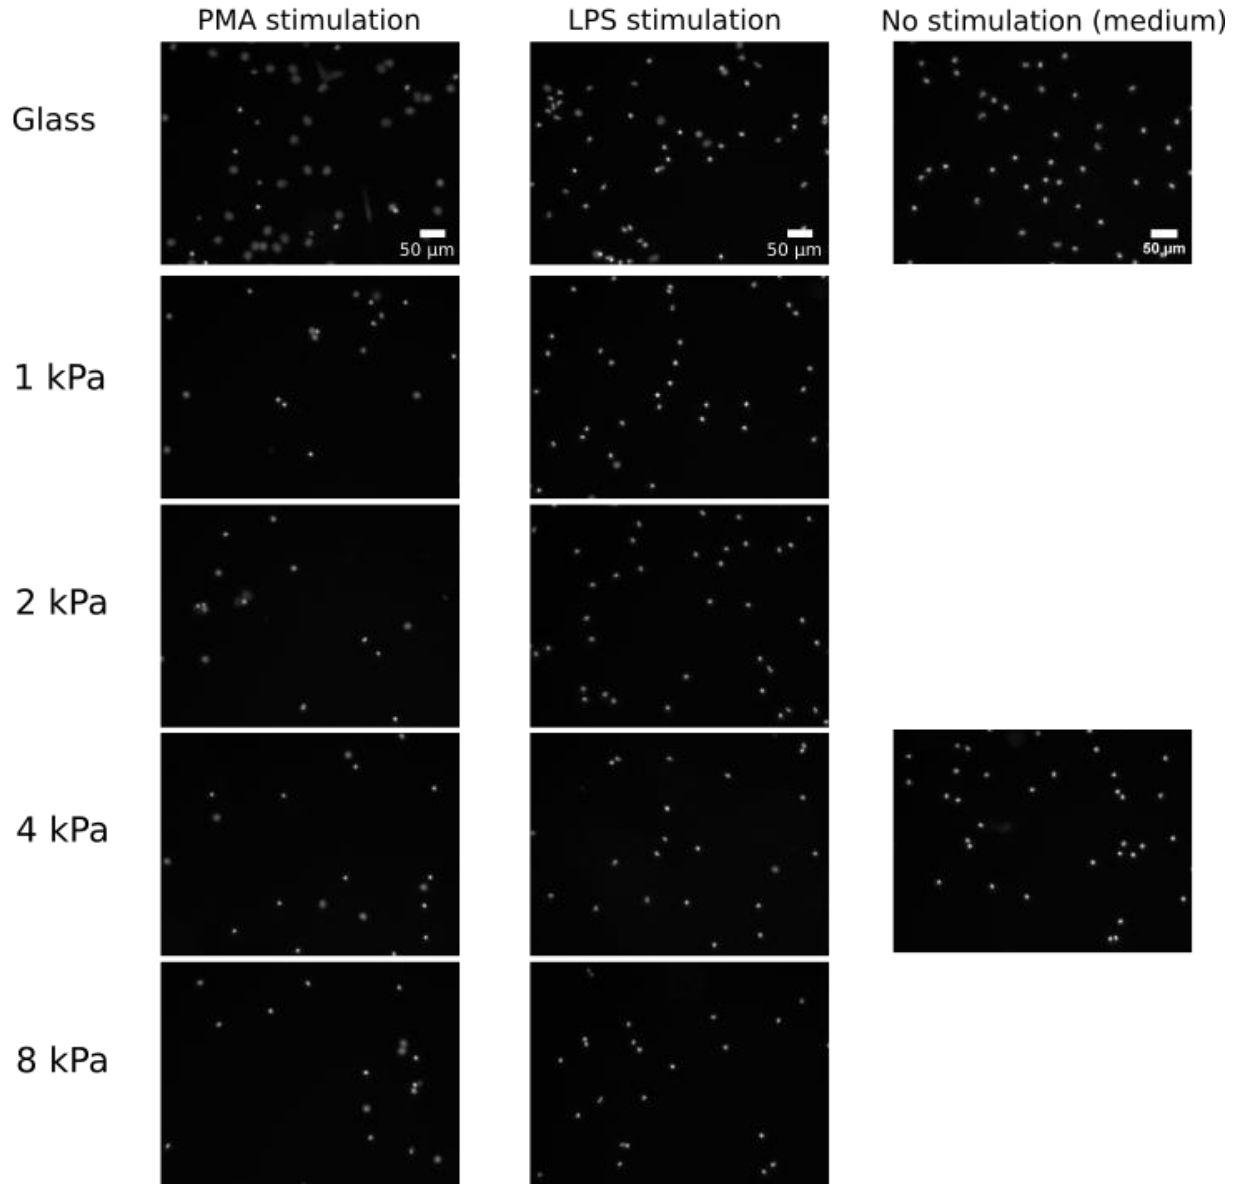

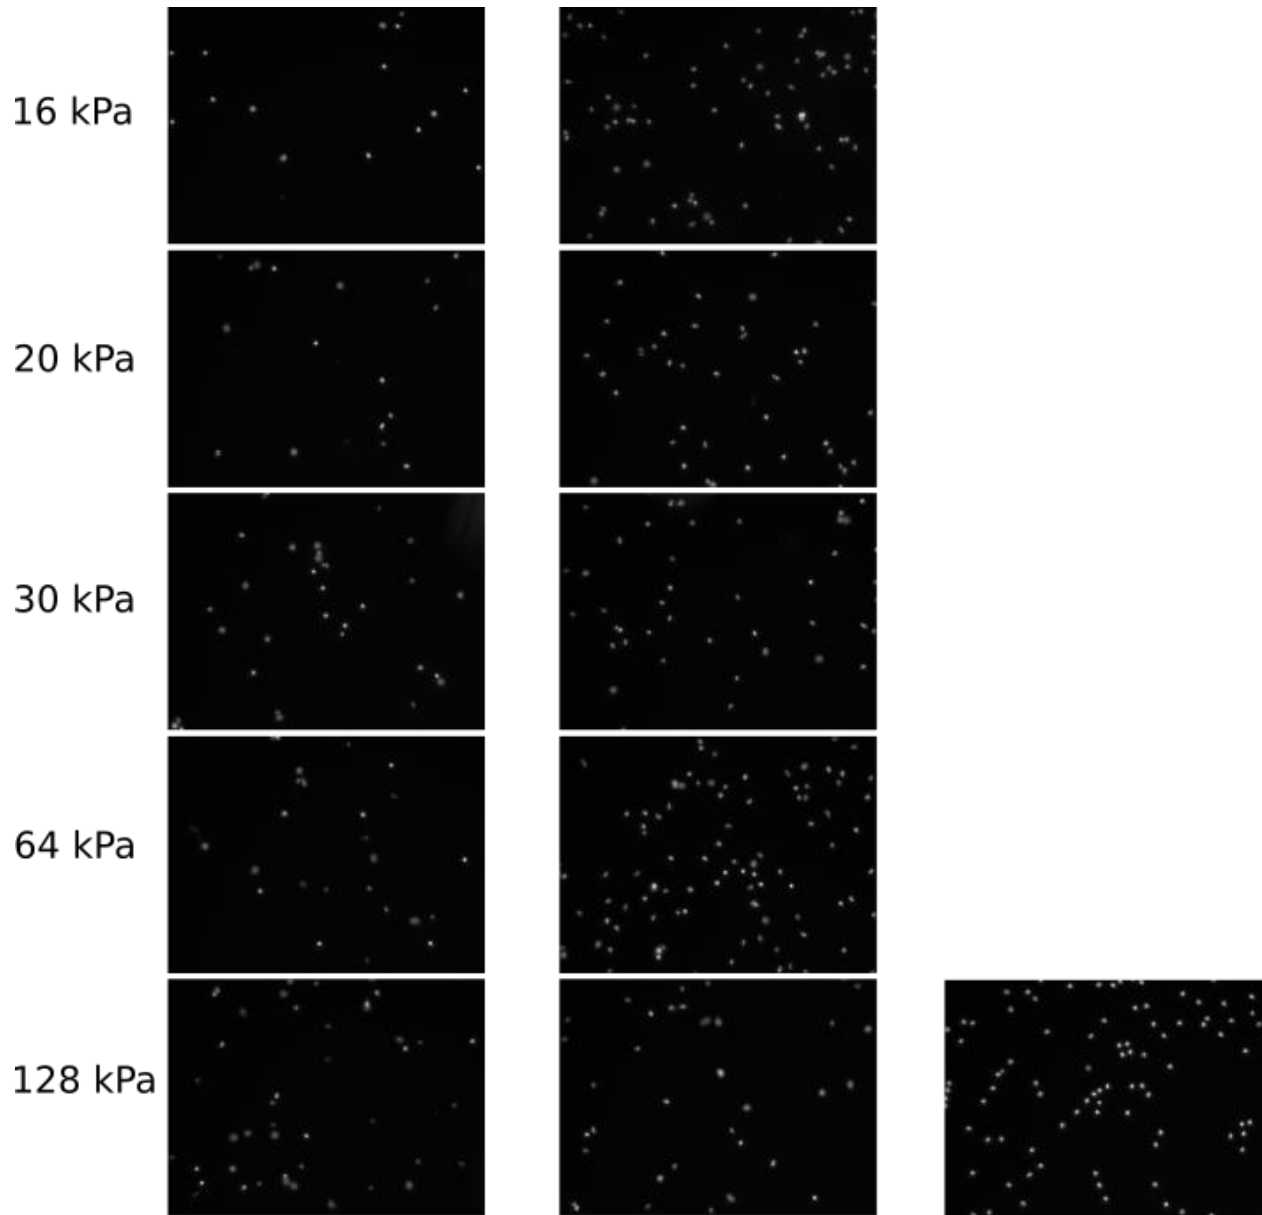

**Supplementary Figure S2** *Fluorescence images of stimulated neutrophils on PAA gels coated with fibrinogen.* Freshly isolated neutrophils were seeded on polyacrylamide substrates and glass surfaces coated with fibrinogen and stimulated either with PMA or LPS for 3h. As vehicle control, neutrophils on 4 kPa and 128 kPa gels were incubated only with RPMI media. After fixation with 2% PFA, cells were stained with Hoechst 33342/ DNA and representative images were taken from each well to quantify NETosis rates.

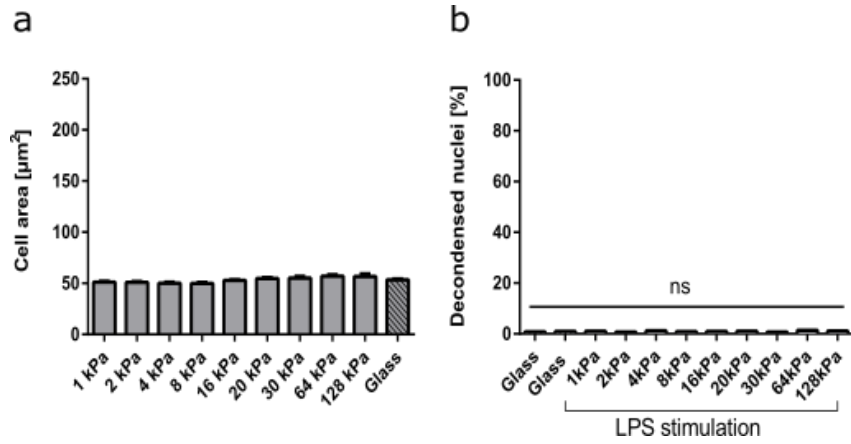

**Supplementary figure S3: NETosis on PAA gels functionalized with higher collagen concentrations.** PAA gels of different elasticity were functionalized with a tenfold higher collagen I concentration (0.2 mg/ml). On those gels neutrophils did not properly adhere and spread (a). Consequently, LPS-induced NETosis did not occur (b).

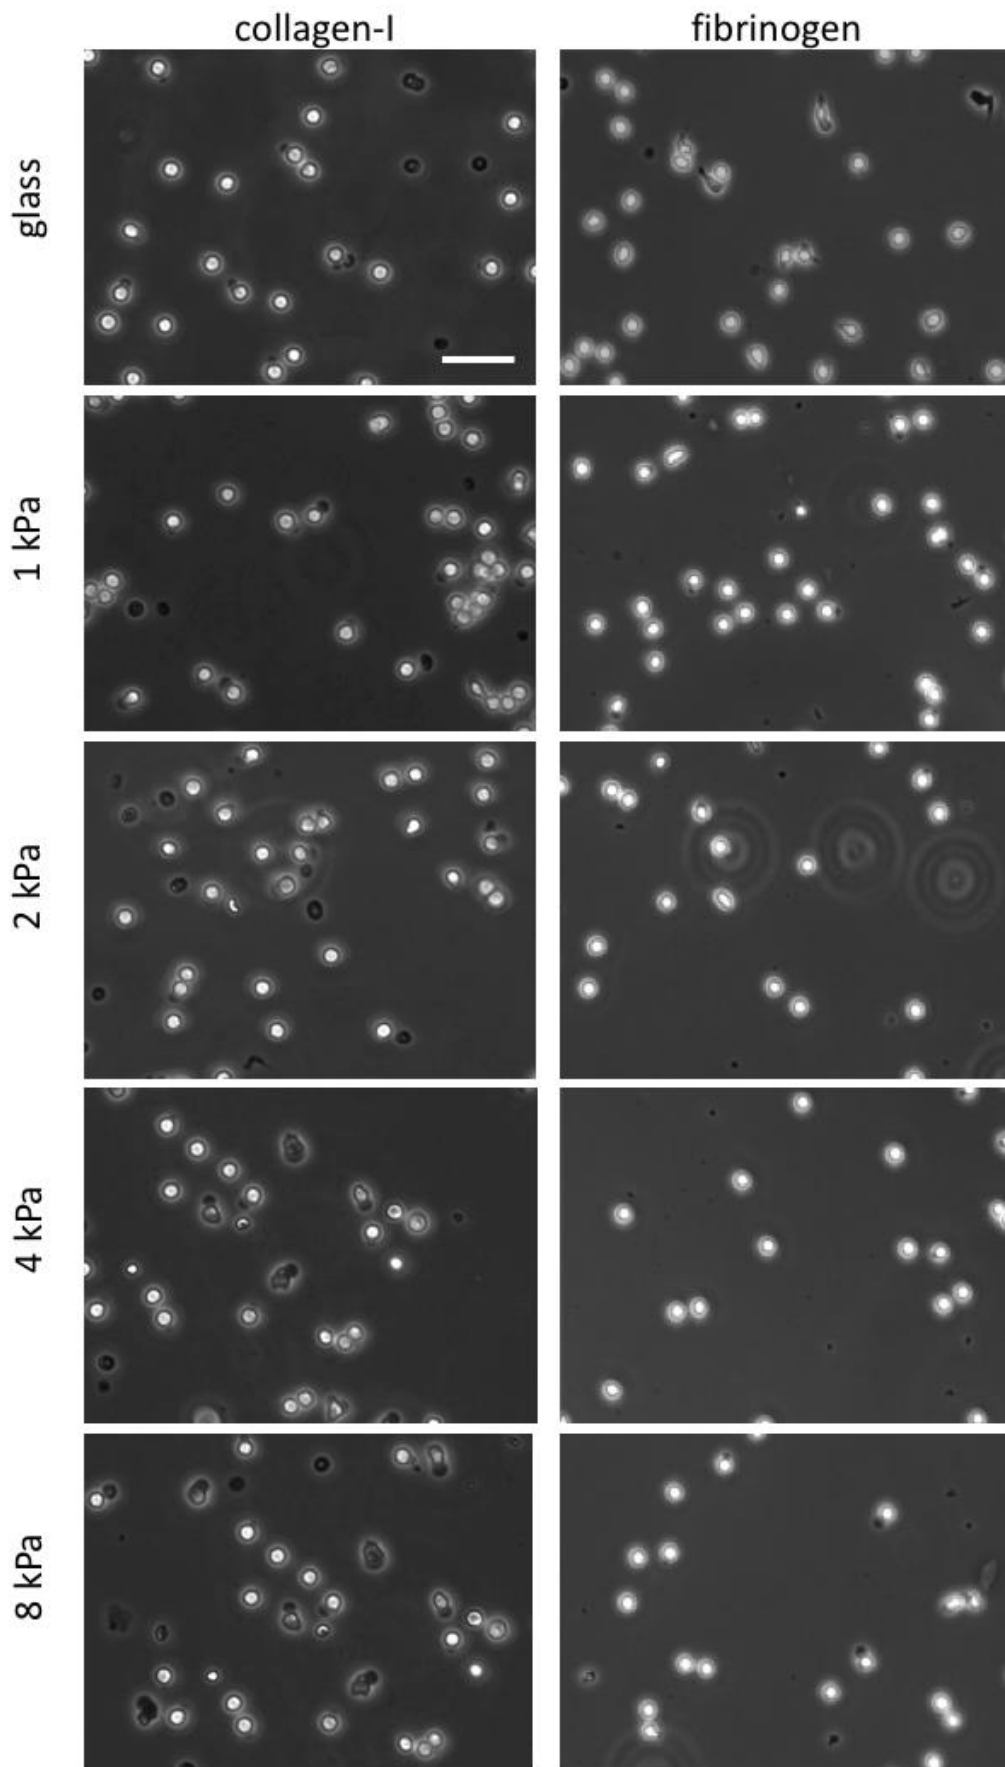

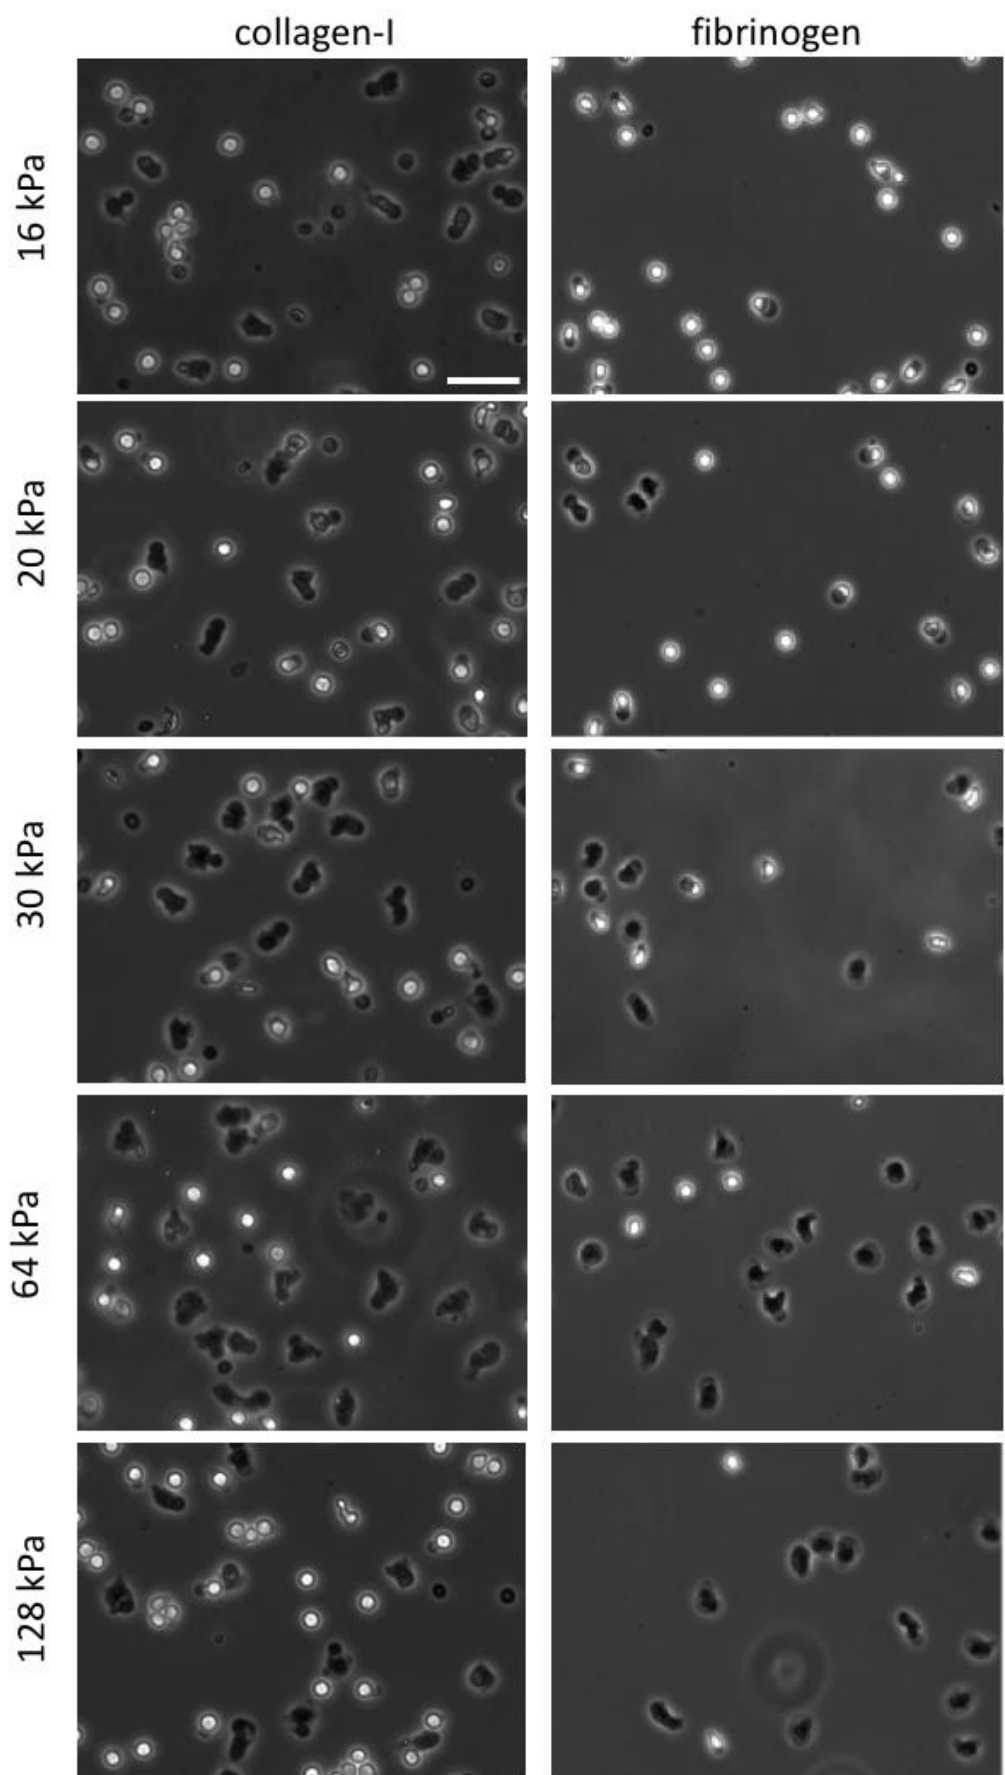



**Supplementary Figure S4** *Phase contrast images of unstimulated neutrophils on PAA gels coated with either collagen-I or fibrinogen. Freshly isolated neutrophils were seeded on polyacrylamide substrates and glass surfaces coated with collagen-I or fibrinogen. After fixation with 2% PFA representative images were taken from each well to quantify changes in cell area.*

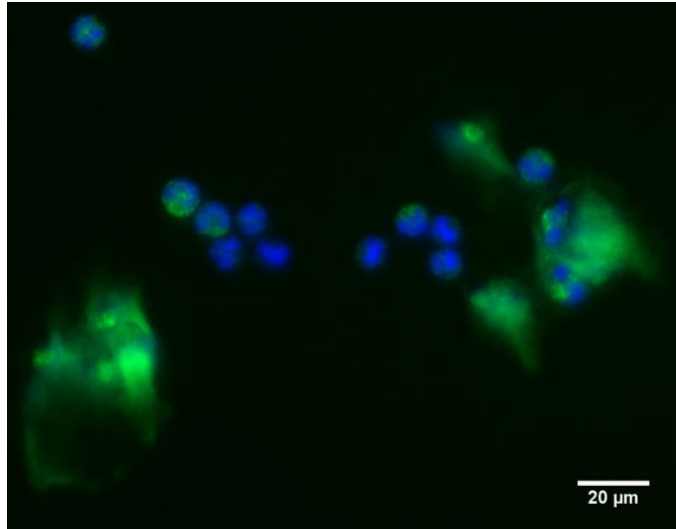

**Supplementary Figure S5** *Neutrophils were seeded on a collagen I-coated 128 kPa PAA gel and stimulated by LPS as described above. After fixation with PFA, cells were stained with anti-MPO antibody (green) and Hoechst against chromatin (blue) and imaged by conventional immunofluorescence microscopy to verify NET production.*

**Table T1: Composition of the PAA gels and Young's modulus**

| Young's modulus $E$ [kPa] | %(v/v) acrylamide in PBS | % (v/v) bis-acrylamide in PBS |
|---------------------------|--------------------------|-------------------------------|
| 1                         | 3                        | 0.20                          |
| 2                         | 3.5                      | 0.20                          |
| 4                         | 3.8                      | 0.20                          |
| 8                         | 6.8                      | 0.10                          |
| 16                        | 6.8                      | 0.20                          |
| 20                        | 8                        | 0.14                          |
| 32                        | 8.6                      | 0.30                          |
| 64                        | 13.2                     | 0.30                          |
| 128                       | 23.6                     | 0.30                          |
